# Supplementary material for: Data-science driven autonomous process optimization
Source: Commun Chem. 2021 Aug 2;4:112. doi: 10.1038/s42004-021-00550-x (PMC9814253; doi:10.1038/s42004-021-00550-x)
Supplement: Supplementary file 5 — Supplementary Data 1 [file 42004_2021_550_MOESM5_ESM.xlsx]

## Sheet: features
CAS	ID	NAME	vmin_vmin_boltz	nbo_P_boltz	nmr_P_boltz	nbo_lp_P_e_boltz	nbo_bds_e_avg_boltz	E_solv_total_boltz	dipolemoment_vburminconf	qpole_amp_boltz	pyr_P_boltz	vbur_vbur_boltz	vbur_vbur_min	vbur_qvbur_max_max	sterimol_B1_boltz	sterimol_B5_boltz	sterimol_L_boltz
657408-07-6	00000003	Sphos	-0.0663027	0.796412	300.972	-0.295813	0.219849	-17.4924	2.94423	8.89442	0.931197	101.116	56.9047	44.0488	4.55045	7.26101	7.78293
819867-24-8	00000007	PhSPhos	-0.0522198	0.811136	296.988	-0.29863	0.233743	-18.394	2.60411	11.6395	0.932469	93.7658	52.1764	42.1483	4.25864	7.16897	7.51441
6163-58-2	00000009	PoTol3	-0.0434791	0.793475	317.294	-0.301923	0.232065	-14.146	1.34142	4.68875	0.918177	71.8351	61.7695	22.1397	4.52679	6.36447	6.97344
554-70-1	00000021	PEt3	-0.0621575	0.732884	315.7	-0.317892	0.201754	-5.00872	1.33525	2.65369	0.951508	47.724	43.8519	15.2418	3.19817	4.82142	6.13761
224311-51-7	00000042	JohnPhos	-0.0666725	0.781709	275.932	-0.291763	0.199657	-13.2621	1.38097	4.64642	0.858996	97.6128	66.5175	42.9876	3.91847	6.32652	7.65424
23897-15-6	00000060	P(mesityl)3	-0.0458399	0.82055	332.046	-0.25944	0.248697	-15.2463	0.733297	5.61749	0.755765	86.6721	86.6721	24.2855	5.0855	7.74595	7.12381
6476-37-5	00000068	PCy2Ph	-0.0597818	0.777885	292.32	-0.303659	0.210722	-12.8284	1.35268	4.94755	0.92799	55.5785	51.8205	28.0058	4.3816	6.74489	7.81955
2234-97-1	00000083	PnPr3	-0.061127	0.739006	332.764	-0.317225	0.20399	-7.04942	1.41065	2.63181	0.956058	54.217	43.4228	22.6871	3.65858	6.0221	6.32936
2741-38-0	00000084	PallylPh2	-0.0489924	0.787795	305.233	-0.319026	0.207965	-12.0462	1.22069	6.93533	0.942146	49.4825	46.7778	18.516	3.39301	6.41245	7.65779
1262046-34-3	00000103	RockPhos	-0.0688164	0.781669	256.584	-0.281184	0.201428	-15.1959	1.52654	11.5191	0.814801	122.743	74.9905	44.6289	3.89783	7.50527	8.66697
739-58-2	00000116	PhAtaPhos	-0.0559598	0.79834	298.032	-0.29829	0.23453	-16.2158	3.59347	12.977	0.930546	50.7539	50.7539	14.8432	4.34614	8.68235	8.3122
53111-20-9	00000130	PPh2(2-OMe-Ph)	-0.054343	0.816807	303.056	-0.303147	0.229551	-14.5623	3.02644	8.48968	0.933303	54.6097	51.9209	17.2926	4.22905	6.38	7.46614
117672-33-0	00000203	PPh2(2,6-Me2-Ph)	-0.0471285	0.8072	305.52	-0.29644	0.227653	-14.2894	1.09439	6.25025	0.892421	63.7041	63.7041	27.4163	4.35523	6.48	7.95319
932710-63-9	00000216	AtaPhos	-0.070188	0.76748	256.656	-0.28339	0.209853	-11.501	3.24092	12.3119	0.855551	63.1134	63.1134	18.2534	3.94894	8.83146	8.1069
5074-71-5	00000234	P(C6F5)2Ph	-0.0225999	0.85489	334.043	-0.35467	0.175687	-7.75639	2.5843	12.9817	0.922769	59.74	59.74	21.1952	4.64677	7.17723	8.30235
4731-53-7	00000239	P(nOct)3	-0.0608311	0.739631	334.061	-0.31765	0.20503	-16.8486	1.58744	1.94198	0.95954	59.8688	42.4676	44.2086	6.16302	11.5049	6.45765
121898-64-4	00000246	P(3,5-Me2-4-OMe-Ph)3	-0.0555033	0.798236	300.055	-0.29945	0.233491	-16.6129	0.138939	13.7197	0.934904	50.5716	50.4285	14.2621	5.48125	8.38054	8.47847
856407-37-9	00000298	(R)SITCP	-0.0535517	0.79007	310.262	-0.32117	0.194413	-17.2407	1.44835	8.75576	0.936801	52.3183	52.3183	18.1151	3.22478	7.21151	10.0619
1000171-05-0	00000320	1-Cy2P-2,4,6-MeO-Ph2	-0.0665243	0.798348	299.744	-0.294113	0.221528	-17.8062	3.90694	12.6178	0.929534	102.23	56.8512	44.4083	4.49038	7.31315	7.79083
1620882-90-7	00000356	PtBu2(E-but-2-enyl), m-CroPhos	-0.0632287	0.760263	268.806	-0.305585	0.186593	-7.99761	1.21716	2.89997	0.886787	60.9232	58.5664	22.5961	3.63233	6.92311	6.74828
322647-83-6	00000487	PPh (4-(2,2-(CF3)2-F7pent)-Ph)2	-0.0389587	0.803249	298.343	-0.318632	0.213969	-12.1061	3.10942	18.4915	0.935787	50.3817	49.2855	15.1223	5.07237	11.0584	10.9041
52090-23-0	00000728	Ph2P(CH2)3Si(OEt)3	-0.0509772	0.779708	304.313	-0.312256	0.216421	-16.599	2.2	8.82147	0.943449	56.0949	46.1063	44.727	4.21831	9.86696	8.24327
1308652-66-5	00000729	Et-PhenCarPhos	-0.0601019	0.771977	325.195	-0.318801	0.203047	-16.881	1.01968	6.87096	0.950162	94.3845	49.3237	43.5001	3.18097	6.8109	7.59766
