# Supplementary material for: Data-science driven autonomous process optimization
Source: Commun Chem. 2021 Aug 2;4:112. doi: 10.1038/s42004-021-00550-x (PMC9814253; doi:10.1038/s42004-021-00550-x)
Supplement: Supplementary file 6 — Supplementary Data 2 [file 42004_2021_550_MOESM6_ESM.csv]

Experiment_ID	Rxn_temp	Pd_vol	554-70-1_vol	6476-37-5_vol	1000171-05-0_vol	117672-33-0_vol	53111-20-9_vol	2741-38-0_vol	224311-51-7_vol	5074-71-5_vol	1262046-34-3_vol	739-58-2_vol	657408-07-6_vol	856407-37-9_vol	23897-15-6_vol	121898-64-4_vol	1308652-66-5_vol	6163-58-2_vol	52090-23-0_vol	322647-83-6_vol	1620882-90-7_vol	932710-63-9_vol	819867-24-8_vol	4731-53-7_vol	2234-97-1_vol	E-Tosyl_IS_vol	ArBA_vol	ACN_vol	K3PO4_vol	IS	ArBA	E-Tosyl	Z-PR	E-PR	E-PR AY	Z-PR AY
1	20.0	25.0	0.0	0.0	0.0	0.0	0.0	0.0	0.0	0.0	0.0	0.0	0.0	0.0	0.0	0.0	0.0	19.0	0.0	0.0	0.0	0.0	0.0	0.0	0.0	20.0	29.999999999999996	106.0	59.99999999999999	398.0556	3258.76489	541.86151	640.83319	917.20386	33.807375235821326	21.71605901263542
2	20.0	25.0	0.0	0.0	0.0	0.0	0.0	0.0	0.0	0.0	0.0	0.0	0.0	0.0	0.0	0.0	0.0	19.0	0.0	0.0	0.0	0.0	0.0	0.0	0.0	20.0	29.999999999999996	106.0	59.99999999999999	333.3049	3952.57324	457.97971	504.33624	719.73438	31.68253098997345	20.41071565812564
3	20.0	25.0	0.0	0.0	0.0	0.0	0.0	0.0	0.0	0.0	0.0	0.0	0.0	0.0	0.0	0.0	0.0	19.0	0.0	0.0	0.0	0.0	0.0	0.0	0.0	20.0	29.999999999999996	106.0	59.99999999999999	399.46585	4752.16797	628.34045	516.45093	761.50189	27.9692387473923	17.439304498169243
4	20.0	25.0	0.0	0.0	0.0	0.0	0.0	0.0	0.0	0.0	0.0	0.0	0.0	0.0	0.0	0.0	0.0	19.0	0.0	0.0	0.0	0.0	0.0	0.0	0.0	20.0	29.999999999999996	106.0	59.99999999999999	406.93179	4323.27295	603.03113	560.06	854.80176	30.820033555795682	18.564903322003918
5	20.0	25.0	0.0	0.0	0.0	0.0	0.0	0.0	0.0	0.0	0.0	0.0	0.0	0.0	0.0	0.0	0.0	19.0	0.0	0.0	0.0	0.0	0.0	0.0	0.0	20.0	29.999999999999996	106.0	59.99999999999999	361.5488	4638.40674	544.03674	505.2117	727.69653	29.530629027561428	18.848909528395613
6	20.0	25.0	0.0	0.0	0.0	0.0	0.0	0.0	0.0	0.0	0.0	0.0	0.0	0.0	0.0	0.0	0.0	19.0	0.0	0.0	0.0	0.0	0.0	0.0	0.0	20.0	29.999999999999996	106.0	59.99999999999999	358.87839	5012.32617	566.72491	460.98691	694.33411	28.38641262830008	17.326906836017628
7	20.0	25.0	0.0	0.0	0.0	0.0	0.0	0.0	0.0	0.0	0.0	0.0	0.0	0.0	0.0	0.0	0.0	19.0	0.0	0.0	0.0	0.0	0.0	0.0	0.0	20.0	29.999999999999996	106.0	59.99999999999999	385.31998	4923.68213	576.68896	520.57843	787.26947	29.977209237475826	18.22402887664948
8	20.0	25.0	0.0	0.0	0.0	0.0	0.0	0.0	0.0	0.0	0.0	0.0	0.0	0.0	0.0	0.0	0.0	19.0	0.0	0.0	0.0	0.0	0.0	0.0	0.0	20.0	29.999999999999996	106.0	59.99999999999999	425.60217	5157.36328	627.49512	599.00043	886.76672	30.569960007111806	18.984670121089845
9	32.81068801879883	27.0	0.0	0.0	0.0	0.0	0.0	0.0	0.0	0.0	0.0	0.0	35.0	0.0	0.0	0.0	0.0	0.0	0.0	0.0	0.0	0.0	0.0	0.0	0.0	20.0	29.999999999999996	88.0	59.99999999999999	426.08994	5542.84131	917.02856	177.15735	496.40723	17.09330870041194	5.608382807981808
10	32.81068801879883	13.0	0.0	0.0	0.0	0.0	0.0	0.0	0.0	0.0	0.0	0.0	0.0	0.0	0.0	0.0	0.0	0.0	0.0	0.0	0.0	0.0	11.0	0.0	0.0	20.0	29.999999999999996	126.0	59.99999999999999	295.05609	3255.82544	264.09213	444.02136	1030.98608	51.2669566175028	20.29920522921591
11	32.81068801879883	28.0	0.0	0.0	0.0	0.0	0.0	0.0	40.0	0.0	0.0	0.0	0.0	0.0	0.0	0.0	0.0	0.0	0.0	0.0	0.0	0.0	0.0	0.0	0.0	20.0	29.999999999999996	82.0	59.99999999999999	417.56854	5930.77832	813.37726	143.09296	15.16273	0.5327690025690154	4.622429020730346
12	32.81068801879883	18.0	0.0	0.0	0.0	0.0	0.0	15.0	0.0	0.0	0.0	0.0	0.0	0.0	0.0	0.0	0.0	0.0	0.0	0.0	0.0	0.0	0.0	0.0	0.0	20.0	29.999999999999996	117.0	59.99999999999999	310.84927	3708.86206	433.86377	783.86523	320.13989	15.110514707272754	34.01506488167079
13	32.81068801879883	34.0	0.0	0.0	0.0	0.0	0.0	0.0	0.0	0.0	32.0	0.0	0.0	0.0	0.0	0.0	0.0	0.0	0.0	0.0	0.0	0.0	0.0	0.0	0.0	20.0	29.999999999999996	84.0	59.99999999999999	461.37338	3353.78613	10.91638	3400.52979	76.94215	2.446814822302925	99.42001061550192
14	32.81068801879883	19.0	0.0	0.0	0.0	0.0	0.0	0.0	31.0	0.0	0.0	0.0	0.0	0.0	0.0	0.0	0.0	0.0	0.0	0.0	0.0	0.0	0.0	0.0	0.0	20.0	29.999999999999996	100.0	59.99999999999999	461.77081	5967.75781	1025.13538	117.91687	14.01697	0.44536592479719544	3.444524047394854
15	32.81068801879883	19.0	15.0	0.0	0.0	0.0	0.0	0.0	0.0	0.0	0.0	0.0	0.0	0.0	0.0	0.0	0.0	0.0	0.0	0.0	0.0	0.0	0.0	0.0	0.0	20.0	29.999999999999996	116.0	59.99999999999999	445.94864	5724.58105	839.58221	528.5141	490.75406	16.146127429203506	15.986429950543183
16	32.81068801879883	20.0	0.0	0.0	0.0	0.0	0.0	0.0	0.0	0.0	0.0	0.0	0.0	0.0	0.0	0.0	0.0	0.0	0.0	0.0	16.0	0.0	0.0	0.0	0.0	20.0	29.999999999999996	114.0	59.99999999999999	279.57159	1913.81091	91.69331	1759.10522	150.39	7.892511824967622	84.87475538047339
17	35.14908218383789	10.0	0.0	0.0	0.0	0.0	0.0	0.0	0.0	0.0	0.0	0.0	0.0	0.0	0.0	0.0	0.0	0.0	0.0	0.0	0.0	0.0	20.0	0.0	0.0	20.0	29.999999999999996	120.0	59.99999999999999	404.51038	4797.21777	488.51184	519.27411	1235.35498	44.807572716823735	17.315967194191654
18	35.14908218383789	48.0	0.0	0.0	0.0	91.0	0.0	0.0	0.0	0.0	0.0	0.0	0.0	0.0	0.0	0.0	0.0	0.0	0.0	0.0	0.0	0.0	0.0	0.0	0.0	20.0	29.999999999999996	11.0	59.99999999999999	462.58646	4155.10938	350.68335	1378.2959	1083.94177	34.379721467506855	40.191045356364306
19	35.14908218383789	42.0	0.0	0.0	0.0	0.0	0.0	0.0	0.0	0.0	0.0	0.0	0.0	0.0	0.0	82.0	0.0	0.0	0.0	0.0	0.0	0.0	0.0	0.0	0.0	20.0	29.999999999999996	26.0	59.99999999999999	425.54047	6051.63574	1150.55469	11.78528	0.0	0.0	0.3735758479563648
20	35.14908218383789	14.0	0.0	0.0	0.0	0.0	0.0	0.0	0.0	0.0	0.0	0.0	0.0	0.0	0.0	0.0	0.0	0.0	0.0	0.0	0.0	0.0	4.0	0.0	0.0	20.0	29.999999999999996	132.0	59.99999999999999	285.67493	2927.62085	146.13196	1024.40393	741.46704	38.08106091381557	48.370308909395725
21	35.14908218383789	50.0	0.0	0.0	0.0	0.0	0.0	0.0	0.0	0.0	0.0	0.0	0.0	0.0	0.0	0.0	0.0	0.0	0.0	0.0	0.0	0.0	0.0	92.0	0.0	20.0	29.999999999999996	8.0	59.99999999999999	381.86035	5675.72461	1007.53107	27.10008	15.66301	0.6018107999953386	0.9572949354914696
22	35.14908218383789	43.0	0.0	0.0	0.0	0.0	0.0	0.0	0.0	0.0	0.0	0.0	0.0	0.0	0.0	0.0	0.0	0.0	0.0	0.0	0.0	0.0	13.0	0.0	0.0	20.0	29.999999999999996	94.0	59.99999999999999	408.53793	3313.98535	7.54845	1402.09509	1624.35645	58.3362182169964	46.29401404420393
23	35.14908218383789	13.0	0.0	0.0	0.0	0.0	0.0	0.0	0.0	0.0	0.0	0.0	0.0	0.0	0.0	0.0	0.0	0.0	0.0	0.0	0.0	0.0	13.0	0.0	0.0	20.0	29.999999999999996	124.0	59.99999999999999	398.55469	4426.45264	275.16745	660.68121	1561.84949	57.49638956018809	22.360617163205383
24	35.14908218383789	50.0	0.0	0.0	0.0	0.0	0.0	0.0	0.0	0.0	0.0	0.0	0.0	0.0	0.0	0.0	0.0	0.0	0.0	98.0	0.0	0.0	0.0	0.0	0.0	20.0	29.999999999999996	2.0	59.99999999999999	383.4035	3540.84521	8.84074	1546.86414	1321.87561	50.585242309785905	54.42216981446439
25	10.369974136352539	10.0	0.0	0.0	0.0	0.0	0.0	0.0	0.0	0.0	0.0	0.0	0.0	0.0	0.0	0.0	0.0	0.0	0.0	0.0	0.0	3.0	0.0	0.0	0.0	20.0	29.999999999999996	137.0	59.99999999999999	389.9906	4807.30127	421.7886	1941.25854	47.57118	1.7896953233231776	67.14427590321408
26	10.369974136352539	10.0	0.0	0.0	0.0	0.0	0.0	0.0	0.0	0.0	0.0	0.0	0.0	0.0	0.0	0.0	3.0	0.0	0.0	0.0	0.0	0.0	0.0	0.0	0.0	20.0	29.999999999999996	137.0	59.99999999999999	397.74835	5644.27393	944.47504	301.62793	174.91359	6.452150442559975	10.229229480826255
27	10.369974136352539	47.0	0.0	0.0	0.0	0.0	0.0	0.0	0.0	0.0	0.0	0.0	0.0	0.0	0.0	0.0	0.0	57.0	0.0	0.0	0.0	0.0	0.0	0.0	0.0	20.0	29.999999999999996	46.0	59.99999999999999	376.01944	6052.19092	1020.11835	13.68956	17.98557	0.7017836179959207	0.49108757472751946
28	10.369974136352539	12.0	0.0	0.0	0.0	0.0	24.0	0.0	0.0	0.0	0.0	0.0	0.0	0.0	0.0	0.0	0.0	0.0	0.0	0.0	0.0	0.0	0.0	0.0	0.0	20.0	29.999999999999996	114.0	59.99999999999999	392.41028	5872.59912	1081.32031	0.0	16.13705	0.6033552372786971	0.0
29	10.369974136352539	18.0	0.0	0.0	0.0	0.0	0.0	0.0	0.0	0.0	0.0	0.0	0.0	35.0	0.0	0.0	0.0	0.0	0.0	0.0	0.0	0.0	0.0	0.0	0.0	20.0	29.999999999999996	97.0	59.99999999999999	429.12543	6233.42139	1155.19568	0.0	0.0	0.0	0.0
30	10.369974136352539	48.0	0.0	0.0	0.0	0.0	0.0	0.0	0.0	0.0	0.0	0.0	0.0	0.0	0.0	0.0	0.0	0.0	0.0	0.0	0.0	0.0	0.0	0.0	45.0	20.0	29.999999999999996	57.0	59.99999999999999	358.84384	5746.39697	800.63074	240.23016	210.56764	8.609450880026253	9.030291918178115
31	10.369974136352539	48.0	0.0	0.0	0.0	0.0	0.0	0.0	0.0	0.0	0.0	28.0	0.0	0.0	0.0	0.0	0.0	0.0	0.0	0.0	0.0	0.0	0.0	0.0	0.0	20.0	29.999999999999996	74.0	59.99999999999999	391.27554	5158.41602	687.12488	501.96399	483.96692	18.1477294753462	17.304920877778358
32	10.369974136352539	50.0	0.0	36.0	0.0	0.0	0.0	0.0	0.0	0.0	0.0	0.0	0.0	0.0	0.0	0.0	0.0	0.0	0.0	0.0	0.0	0.0	0.0	0.0	0.0	20.0	29.999999999999996	64.0	59.99999999999999	458.65823	5153.65674	799.76392	1021.06885	255.73802	8.180793418751039	30.029326450001786
33	36.366249084472656	45.0	0.0	0.0	0.0	0.0	0.0	0.0	0.0	0.0	0.0	0.0	0.0	0.0	0.0	0.0	0.0	0.0	0.0	0.0	0.0	0.0	17.0	0.0	0.0	20.0	29.999999999999996	88.0	59.99999999999999	420.76016	2627.67212	46.80091	1294.3407	1819.14185	63.43387934637158	41.49480716591609
34	36.366249084472656	50.0	0.0	0.0	0.0	0.0	0.0	0.0	0.0	0.0	0.0	0.0	0.0	0.0	0.0	0.0	0.0	0.0	58.0	0.0	0.0	0.0	0.0	0.0	0.0	20.0	29.999999999999996	42.0	59.99999999999999	394.73795	4042.21167	35.37024	1906.03589	796.33942	29.599109916439502	65.13312976421447
35	36.366249084472656	50.0	0.0	58.0	0.0	0.0	0.0	0.0	0.0	0.0	0.0	0.0	0.0	0.0	0.0	0.0	0.0	0.0	0.0	0.0	0.0	0.0	0.0	0.0	0.0	20.0	29.999999999999996	42.0	59.99999999999999	423.41583	6152.70117	1163.50488	0.0	0.0	0.0	0.0
36	36.366249084472656	14.0	0.0	0.0	0.0	0.0	0.0	0.0	0.0	0.0	0.0	0.0	0.0	0.0	0.0	0.0	0.0	0.0	0.0	0.0	0.0	0.0	20.0	0.0	0.0	20.0	29.999999999999996	116.0	59.99999999999999	298.67191	3323.2959	209.76474	484.62769	1151.37183	56.560148189898406	21.887371030004125
37	36.366249084472656	33.0	0.0	0.0	0.0	0.0	0.0	0.0	0.0	0.0	0.0	0.0	0.0	0.0	0.0	0.0	0.0	0.0	9.0	0.0	0.0	0.0	0.0	0.0	0.0	20.0	29.999999999999996	108.0	59.99999999999999	282.28479	2636.71802	54.41041	1400.42773	650.93536	33.83293730391921	66.91954479718869
38	36.366249084472656	13.0	0.0	0.0	0.0	0.0	0.0	0.0	0.0	0.0	0.0	0.0	0.0	0.0	0.0	0.0	0.0	0.0	0.0	0.0	0.0	0.0	17.0	0.0	0.0	20.0	29.999999999999996	120.0	59.99999999999999	414.41187	4562.16992	258.35165	718.77856	1690.11768	59.83758766600967	23.39605763666953
39	36.366249084472656	49.0	0.0	0.0	0.0	0.0	0.0	0.0	0.0	0.0	0.0	0.0	0.0	0.0	23.0	0.0	0.0	0.0	0.0	0.0	0.0	0.0	0.0	0.0	0.0	20.0	29.999999999999996	78.0	59.99999999999999	267.12286	2446.18311	6.70845	1996.67322	55.99625	3.0756520800952796	100.82673218076506
40	36.366249084472656	16.0	0.0	0.0	0.0	0.0	0.0	0.0	0.0	0.0	0.0	0.0	0.0	0.0	0.0	0.0	0.0	0.0	0.0	0.0	0.0	0.0	21.0	0.0	0.0	20.0	29.999999999999996	113.0	59.99999999999999	282.53946	3253.75781	192.12241	465.98807	1109.78821	57.630224879455774	22.247204253274923
41	14.3204345703125	45.0	0.0	0.0	0.0	0.0	0.0	0.0	0.0	85.0	0.0	0.0	0.0	0.0	0.0	0.0	0.0	0.0	0.0	0.0	0.0	0.0	0.0	0.0	0.0	20.0	29.999999999999996	20.0	59.99999999999999	423.18286	6216.35352	1167.50964	90.24766	72.97991	2.530256635441237	2.8766540444005697
42	14.3204345703125	30.0	0.0	0.0	0.0	0.0	0.0	0.0	0.0	0.0	0.0	0.0	0.0	0.0	19.0	0.0	0.0	0.0	0.0	0.0	0.0	0.0	0.0	0.0	0.0	20.0	29.999999999999996	101.0	59.99999999999999	273.93387	2538.729	50.73646	1991.2168	47.61881	2.550481181169747	98.05112239388288
43	14.3204345703125	23.0	0.0	0.0	0.0	0.0	0.0	0.0	0.0	0.0	0.0	25.0	0.0	0.0	0.0	0.0	0.0	0.0	0.0	0.0	0.0	0.0	0.0	0.0	0.0	20.0	29.999999999999996	102.0	59.99999999999999	390.811	5765.88818	1073.42139	0.0	0.0	0.0	0.0
44	14.3204345703125	27.0	0.0	0.0	0.0	0.0	0.0	0.0	0.0	0.0	0.0	0.0	0.0	0.0	0.0	0.0	0.0	0.0	0.0	0.0	22.0	0.0	0.0	0.0	0.0	20.0	29.999999999999996	101.0	59.99999999999999	399.41531	4421.92334	425.73688	1842.50391	147.16624	5.405959709656598	62.22479364146057
45	14.3204345703125	44.0	0.0	0.0	0.0	0.0	0.0	0.0	0.0	0.0	0.0	0.0	0.0	0.0	0.0	0.0	0.0	0.0	0.0	0.0	0.0	0.0	0.0	25.0	0.0	20.0	29.999999999999996	81.0	59.99999999999999	383.54449	3711.0918	108.73443	2540.32397	146.53896	5.605658997004494	89.34147387003266
46	14.3204345703125	38.0	0.0	0.0	0.0	0.0	0.0	0.0	0.0	0.0	0.0	0.0	0.0	0.0	0.0	0.0	75.0	0.0	0.0	0.0	0.0	0.0	0.0	0.0	0.0	20.0	29.999999999999996	37.0	59.99999999999999	374.73724	6049.01367	1007.3299	13.02969	8.02561	0.31422484170508386	0.4690152716340656
47	14.3204345703125	26.0	0.0	0.0	27.0	0.0	0.0	0.0	0.0	0.0	0.0	0.0	0.0	0.0	0.0	0.0	0.0	0.0	0.0	0.0	0.0	0.0	0.0	0.0	0.0	20.0	29.999999999999996	97.0	59.99999999999999	377.38199	5856.23633	1014.30292	20.69892	9.0732	0.35275130750145234	0.7398544161580155
48	14.3204345703125	32.0	0.0	0.0	0.0	0.0	0.0	0.0	17.0	0.0	0.0	0.0	0.0	0.0	0.0	0.0	0.0	0.0	0.0	0.0	0.0	0.0	0.0	0.0	0.0	20.0	29.999999999999996	101.0	59.99999999999999	286.08185	4344.91406	488.53888	502.76996	23.94097	1.2278371096943064	23.706026755769376
49	37.96045684814453	11.0	0.0	0.0	0.0	0.0	0.0	0.0	0.0	0.0	0.0	0.0	0.0	0.0	0.0	0.0	0.0	0.0	0.0	0.0	0.0	0.0	15.0	0.0	0.0	20.0	29.999999999999996	124.0	59.99999999999999	467.97159	4586.92041	428.79562	722.50568	1721.61194	53.97654670378602	20.82579226127808
50	37.96045684814453	11.0	0.0	0.0	0.0	0.0	0.0	0.0	0.0	0.0	0.0	0.0	0.0	0.0	0.0	0.0	0.0	16.0	0.0	0.0	0.0	0.0	0.0	0.0	0.0	20.0	29.999999999999996	123.0	59.99999999999999	279.48981	4149.01074	534.68518	252.73271	374.21204	19.644505289405725	12.19762368148592
51	37.96045684814453	11.0	0.0	0.0	0.0	0.0	15.0	0.0	0.0	0.0	0.0	0.0	0.0	0.0	0.0	0.0	0.0	0.0	0.0	0.0	0.0	0.0	0.0	0.0	0.0	20.0	29.999999999999996	124.0	59.99999999999999	299.46884	4612.84619	641.73987	326.39017	150.032	7.350579459285315	14.701619718198396
52	37.96045684814453	11.0	0.0	0.0	0.0	0.0	0.0	0.0	0.0	0.0	0.0	16.0	0.0	0.0	0.0	0.0	0.0	0.0	0.0	0.0	0.0	0.0	0.0	0.0	0.0	20.0	29.999999999999996	123.0	59.99999999999999	298.09033	4784.86523	775.79376	49.91517	18.18554	0.8950919101602525	2.258730526850704
53	37.96045684814453	10.0	0.0	0.0	0.0	0.0	0.0	0.0	0.0	0.0	0.0	0.0	0.0	0.0	0.0	0.0	0.0	0.0	0.0	0.0	0.0	0.0	13.0	0.0	0.0	20.0	29.999999999999996	127.0	59.99999999999999	254.71973	2935.80713	229.83618	368.14352	879.10138	50.636734921790314	19.49549782138981
54	37.96045684814453	11.0	0.0	0.0	0.0	0.0	0.0	0.0	0.0	0.0	0.0	0.0	0.0	0.0	0.0	0.0	0.0	0.0	0.0	0.0	0.0	16.0	0.0	0.0	0.0	20.0	29.999999999999996	123.0	59.99999999999999	298.08014	3593.78247	488.21844	769.54504	98.75575	4.86092218018953	34.82416857614197
55	37.96045684814453	22.0	0.0	0.0	0.0	0.0	0.0	0.0	0.0	0.0	0.0	0.0	0.0	0.0	0.0	0.0	0.0	0.0	0.0	0.0	0.0	0.0	0.0	0.0	6.0	20.0	29.999999999999996	122.0	59.99999999999999	308.27933	2557.19727	32.83574	2091.15698	212.51575	10.114304724874028	91.50018751896212
56	37.96045684814453	11.0	0.0	0.0	0.0	0.0	0.0	0.0	0.0	0.0	0.0	0.0	0.0	0.0	15.0	0.0	0.0	0.0	0.0	0.0	0.0	0.0	0.0	0.0	0.0	20.0	29.999999999999996	124.0	59.99999999999999	402.91107	4214.26074	295.3728	2302.9248	63.21013	2.3017958463141754	77.09927807940348
57	22.518356323242188	11.0	0.0	0.0	0.0	0.0	0.0	0.0	0.0	0.0	0.0	0.0	0.0	0.0	17.0	0.0	0.0	0.0	0.0	0.0	0.0	0.0	0.0	0.0	0.0	20.0	29.999999999999996	122.0	59.99999999999999	326.93417	4488.31982	267.03528	2032.50281	51.10396	2.2934198071740255	83.85917692265082
58	22.518356323242188	11.0	0.0	0.0	0.0	0.0	0.0	0.0	0.0	0.0	0.0	0.0	0.0	0.0	0.0	0.0	0.0	0.0	0.0	0.0	0.0	0.0	5.0	0.0	0.0	20.0	29.999999999999996	134.0	59.99999999999999	408.92838	4789.09766	572.6109	504.28552	1028.74536	36.91050232786484	16.63447124721449
59	22.518356323242188	46.0	0.0	0.0	19.0	0.0	0.0	0.0	0.0	0.0	0.0	0.0	0.0	0.0	0.0	0.0	0.0	0.0	0.0	0.0	0.0	0.0	0.0	0.0	0.0	20.0	29.999999999999996	85.0	59.99999999999999	408.03729	3560.80127	285.79599	2299.06958	64.27895	2.3113102099075307	76.00322403038213
60	22.518356323242188	10.0	0.0	14.0	0.0	0.0	0.0	0.0	0.0	0.0	0.0	0.0	0.0	0.0	0.0	0.0	0.0	0.0	0.0	0.0	0.0	0.0	0.0	0.0	0.0	20.0	29.999999999999996	126.0	59.99999999999999	254.19731	5314.60352	691.16882	0.0	0.0	0.0	0.0
61	22.518356323242188	12.0	0.0	0.0	0.0	0.0	0.0	0.0	0.0	0.0	19.0	0.0	0.0	0.0	0.0	0.0	0.0	0.0	0.0	0.0	0.0	0.0	0.0	0.0	0.0	20.0	29.999999999999996	119.0	59.99999999999999	279.09091	2860.67114	102.76711	1873.98682	36.42184	1.9147210365253389	90.57338418861438
62	22.518356323242188	41.0	0.0	0.0	0.0	0.0	0.0	0.0	0.0	0.0	0.0	0.0	0.0	0.0	0.0	0.0	0.0	0.0	0.0	0.0	0.0	0.0	12.0	0.0	0.0	20.0	29.999999999999996	97.0	59.99999999999999	262.51413	2747.56006	35.87944	832.68372	999.89465	55.884436791269096	42.786537620203525
63	22.518356323242188	11.0	0.0	0.0	0.0	0.0	0.0	0.0	0.0	0.0	0.0	0.0	0.0	0.0	0.0	0.0	0.0	0.0	17.0	0.0	0.0	0.0	0.0	0.0	0.0	20.0	29.999999999999996	122.0	59.99999999999999	327.20761	5502.68457	885.97363	16.9529	5.62053	0.2520247501578585	0.698876374238362
64	22.518356323242188	10.0	0.0	0.0	0.0	0.0	0.0	0.0	0.0	0.0	0.0	0.0	0.0	0.0	0.0	0.0	0.0	0.0	0.0	0.0	0.0	0.0	14.0	0.0	0.0	20.0	29.999999999999996	126.0	59.99999999999999	353.28091	5088.74023	550.19879	338.53058	812.12299	33.728028240416386	12.925801718581399
65	25.98479461669922	47.0	0.0	0.0	0.0	0.0	0.0	0.0	0.0	0.0	0.0	0.0	0.0	0.0	0.0	0.0	0.0	0.0	0.0	0.0	0.0	0.0	20.0	0.0	0.0	20.0	29.999999999999996	83.0	59.99999999999999	440.07407	3351.60938	102.48827	1088.37195	1946.1001	64.88267001779951	33.360405064424725
66	25.98479461669922	46.0	0.0	0.0	0.0	0.0	0.0	0.0	0.0	0.0	0.0	0.0	0.0	56.0	0.0	0.0	0.0	0.0	0.0	0.0	0.0	0.0	0.0	0.0	0.0	20.0	29.999999999999996	48.0	59.99999999999999	405.07513	6000.96143	1032.5874	113.14464	0.0	0.0	3.7677160011279884
67	25.98479461669922	42.0	0.0	0.0	0.0	0.0	0.0	0.0	0.0	0.0	0.0	0.0	0.0	0.0	0.0	0.0	0.0	0.0	0.0	0.0	0.0	66.0	0.0	0.0	0.0	20.0	29.999999999999996	42.0	59.99999999999999	426.18979	5849.33643	1134.43127	96.07814	13.72693	0.4725629794181601	3.040894129490995
68	25.98479461669922	28.0	0.0	0.0	55.0	0.0	0.0	0.0	0.0	0.0	0.0	0.0	0.0	0.0	0.0	0.0	0.0	0.0	0.0	0.0	0.0	0.0	0.0	0.0	0.0	20.0	29.999999999999996	67.0	59.99999999999999	392.90753	5810.4043	1045.25696	28.05357	30.94759	1.1556486089233262	0.9631136510160547
69	25.98479461669922	41.0	65.0	0.0	0.0	0.0	0.0	0.0	0.0	0.0	0.0	0.0	0.0	0.0	0.0	0.0	0.0	0.0	0.0	0.0	0.0	0.0	0.0	0.0	0.0	20.0	29.999999999999996	44.0	59.99999999999999	301.95026	4694.37012	810.27136	0.0	0.0	0.0	0.0
70	25.98479461669922	31.0	0.0	0.0	0.0	0.0	0.0	0.0	0.0	0.0	0.0	0.0	0.0	0.0	0.0	0.0	62.0	0.0	0.0	0.0	0.0	0.0	0.0	0.0	0.0	20.0	29.999999999999996	57.0	59.99999999999999	296.41989	4548.83545	774.36487	35.77135	32.12045	1.5898772595860553	1.62782511035275
71	25.98479461669922	42.0	0.0	0.0	0.0	0.0	0.0	68.0	0.0	0.0	0.0	0.0	0.0	0.0	0.0	0.0	0.0	0.0	0.0	0.0	0.0	0.0	0.0	0.0	0.0	20.0	29.999999999999996	40.0	59.99999999999999	296.41907	4387.02393	748.96393	106.0694	28.58288	1.4147808214903315	4.8268491517769085
72	25.98479461669922	37.0	0.0	0.0	0.0	0.0	0.0	0.0	0.0	0.0	0.0	0.0	0.0	0.0	0.0	0.0	0.0	0.0	0.0	0.0	0.0	0.0	14.0	0.0	0.0	20.0	29.999999999999996	99.0	59.99999999999999	395.04529	3901.11084	87.47565	991.38007	1680.23206	62.403894966878354	33.851120625257934
73	27.452526092529297	47.0	0.0	0.0	0.0	0.0	0.0	0.0	0.0	0.0	0.0	0.0	0.0	0.0	0.0	0.0	0.0	0.0	0.0	0.0	0.0	0.0	19.0	0.0	0.0	20.0	29.999999999999996	84.0	59.99999999999999	466.67603	3737.38916	86.86099	1265.68103	2016.28784	63.39081779812003	36.58377614481292
74	27.452526092529297	33.0	0.0	0.0	0.0	0.0	16.0	0.0	0.0	0.0	0.0	0.0	0.0	0.0	0.0	0.0	0.0	0.0	0.0	0.0	0.0	0.0	0.0	0.0	0.0	20.0	29.999999999999996	101.0	59.99999999999999	305.18958	3330.26953	297.17712	593.10498	818.47858	39.34838707717348	26.214502720636794
75	27.452526092529297	34.0	0.0	0.0	0.0	0.0	0.0	0.0	0.0	0.0	9.0	0.0	0.0	0.0	0.0	0.0	0.0	0.0	0.0	0.0	0.0	0.0	0.0	0.0	0.0	20.0	29.999999999999996	107.0	59.99999999999999	304.69781	2019.05859	33.89986	2317.36621	60.37974	2.907443100034096	102.59001469912108
76	27.452526092529297	34.0	0.0	0.0	0.0	0.0	0.0	0.0	0.0	0.0	0.0	0.0	0.0	11.0	0.0	0.0	0.0	0.0	0.0	0.0	0.0	0.0	0.0	0.0	0.0	20.0	29.999999999999996	105.0	59.99999999999999	426.79926	3993.21411	207.13174	2212.69116	479.61322	16.487575830942163	69.9321527812396
77	27.452526092529297	32.0	0.0	0.0	0.0	0.0	0.0	0.0	0.0	0.0	0.0	0.0	0.0	0.0	0.0	0.0	13.0	0.0	0.0	0.0	0.0	0.0	0.0	0.0	0.0	20.0	29.999999999999996	105.0	59.99999999999999	462.84766	4459.21973	570.47498	996.35944	869.24347	27.554509386176868	29.037399662256043
78	27.452526092529297	34.0	0.0	0.0	0.0	0.0	0.0	0.0	0.0	0.0	0.0	0.0	0.0	0.0	0.0	0.0	0.0	0.0	0.0	0.0	0.0	13.0	0.0	0.0	0.0	20.0	29.999999999999996	103.0	59.99999999999999	418.17654	3869.76172	101.39998	2640.97656	263.5213	9.245818796052022	85.18921893093287
79	27.452526092529297	50.0	0.0	0.0	0.0	0.0	0.0	0.0	0.0	0.0	0.0	0.0	0.0	0.0	0.0	0.0	0.0	0.0	0.0	27.0	0.0	0.0	0.0	0.0	0.0	20.0	29.999999999999996	73.0	59.99999999999999	424.9169	3337.54932	5.96316	1941.60706	1183.29785	40.858214994979015	61.63637556505755
80	27.452526092529297	50.0	0.0	0.0	0.0	0.0	0.0	0.0	0.0	26.0	0.0	0.0	0.0	0.0	0.0	0.0	0.0	0.0	0.0	0.0	0.0	0.0	0.0	0.0	0.0	20.0	29.999999999999996	74.0	59.99999999999999	400.37894	5437.32227	782.12549	788.13007	99.09386	3.6313226512863044	26.55256171623313
81	27.395000457763672	42.0	0.0	0.0	0.0	0.0	0.0	0.0	0.0	0.0	0.0	0.0	0.0	0.0	0.0	0.0	0.0	0.0	0.0	0.0	0.0	0.0	29.0	0.0	0.0	20.0	29.999999999999996	79.0	59.99999999999999	380.0303	3694.48047	49.68411	833.6615	1859.36316	71.78526628934588	29.590429956506103
82	27.395000457763672	14.0	0.0	4.0	0.0	0.0	0.0	0.0	0.0	0.0	0.0	0.0	0.0	0.0	0.0	0.0	0.0	0.0	0.0	0.0	0.0	0.0	0.0	0.0	0.0	20.0	29.999999999999996	132.0	59.99999999999999	417.75745	4397.51318	134.19589	2622.27661	277.96826	9.76248373480832	84.67087586897613
83	27.395000457763672	36.0	0.0	0.0	0.0	0.0	0.0	0.0	0.0	0.0	0.0	0.0	0.0	0.0	0.0	0.0	0.0	0.0	0.0	0.0	0.0	0.0	17.0	0.0	0.0	20.0	29.999999999999996	97.0	59.99999999999999	443.26236	3414.96021	137.35768	961.05676	1937.88843	64.14417647589116	29.24609848587189
84	27.395000457763672	33.0	0.0	0.0	0.0	0.0	0.0	0.0	0.0	0.0	0.0	0.0	0.0	0.0	0.0	0.0	0.0	0.0	32.0	0.0	0.0	0.0	0.0	0.0	0.0	20.0	29.999999999999996	85.0	59.99999999999999	405.16864	4580.75244	394.79071	1188.16345	630.69391	22.838739561679798	39.55670601024305
85	27.395000457763672	17.0	0.0	0.0	0.0	0.0	0.0	0.0	5.0	0.0	0.0	0.0	0.0	0.0	0.0	0.0	0.0	0.0	0.0	0.0	0.0	0.0	0.0	0.0	0.0	20.0	29.999999999999996	128.0	59.99999999999999	383.72568	4010.64868	153.86993	2344.55371	60.53099	2.3144416221504907	82.41743162508696
86	27.395000457763672	17.0	0.0	0.0	0.0	0.0	0.0	0.0	0.0	0.0	0.0	0.0	0.0	0.0	0.0	0.0	0.0	0.0	0.0	0.0	0.0	0.0	0.0	5.0	0.0	20.0	29.999999999999996	128.0	59.99999999999999	371.36169	4002.16553	176.7748	2317.48267	116.30622	4.595102041462597	84.17810608205171
87	27.395000457763672	48.0	0.0	0.0	0.0	0.0	0.0	18.0	0.0	0.0	0.0	0.0	0.0	0.0	0.0	0.0	0.0	0.0	0.0	0.0	0.0	0.0	0.0	0.0	0.0	20.0	29.999999999999996	84.0	59.99999999999999	409.83398	4424.57861	339.69342	1339.73206	755.23059	27.03715103486539	44.09504003874935
88	27.395000457763672	36.0	0.0	0.0	0.0	0.0	0.0	0.0	0.0	0.0	0.0	0.0	43.0	0.0	0.0	0.0	0.0	0.0	0.0	0.0	0.0	0.0	0.0	0.0	0.0	20.0	29.999999999999996	71.0	59.99999999999999	277.00433	4121.96289	526.75574	157.91837	374.69986	19.846607978727263	7.6899913186555615
89	10.112961769104004	46.0	0.0	0.0	0.0	0.0	0.0	0.0	0.0	0.0	0.0	20.0	0.0	0.0	0.0	0.0	0.0	0.0	0.0	0.0	0.0	0.0	0.0	0.0	0.0	20.0	29.999999999999996	84.0	59.99999999999999	454.66794	5610.30664	762.80957	633.2146	692.7132	22.353650161478292	18.78608757723274
90	10.112961769104004	10.0	0.0	0.0	0.0	0.0	0.0	0.0	0.0	0.0	0.0	0.0	0.0	0.0	0.0	0.0	0.0	0.0	0.0	0.0	0.0	0.0	11.0	0.0	0.0	20.0	29.999999999999996	129.0	59.99999999999999	397.2276	5504.37207	881.03522	161.40102	386.06851	14.2598278133745	5.480833554314957
91	10.112961769104004	31.0	0.0	0.0	0.0	0.0	0.0	0.0	0.0	0.0	0.0	0.0	0.0	0.0	0.0	46.0	0.0	0.0	0.0	0.0	0.0	0.0	0.0	0.0	0.0	20.0	29.999999999999996	73.0	59.99999999999999	483.83496	6316.27197	1323.50623	0.0	0.0	0.0	0.0
92	10.112961769104004	31.0	0.0	0.0	0.0	0.0	0.0	0.0	0.0	0.0	0.0	0.0	49.0	0.0	0.0	0.0	0.0	0.0	0.0	0.0	0.0	0.0	0.0	0.0	0.0	20.0	29.999999999999996	70.0	59.99999999999999	409.61163	5954.96484	1098.40515	20.71376	42.62376	1.5267530531786904	0.6821288463904212
93	10.112961769104004	11.0	0.0	0.0	0.0	0.0	0.0	0.0	0.0	0.0	0.0	0.0	15.0	0.0	0.0	0.0	0.0	0.0	0.0	0.0	0.0	0.0	0.0	0.0	0.0	20.0	29.999999999999996	124.0	59.99999999999999	444.7475	6082.91553	1213.44946	11.86424	18.33949	0.6050107022074324	0.35983728601060155
94	10.112961769104004	10.0	9.0	0.0	0.0	0.0	0.0	0.0	0.0	0.0	0.0	0.0	0.0	0.0	0.0	0.0	0.0	0.0	0.0	0.0	0.0	0.0	0.0	0.0	0.0	20.0	29.999999999999996	131.0	59.99999999999999	462.60059	5707.34424	1091.96558	295.54831	169.8055	5.385609854064389	8.617911952057822
95	10.112961769104004	10.0	0.0	0.0	0.0	9.0	0.0	0.0	0.0	0.0	0.0	0.0	0.0	0.0	0.0	0.0	0.0	0.0	0.0	0.0	0.0	0.0	0.0	0.0	0.0	20.0	29.999999999999996	131.0	59.99999999999999	316.24826	4854.51025	791.12476	107.06354	79.01582	3.665854512654078	4.566602488374166
96	10.112961769104004	36.0	0.0	0.0	0.0	0.0	0.0	0.0	0.0	0.0	0.0	0.0	0.0	0.0	0.0	0.0	0.0	0.0	0.0	0.0	0.0	0.0	55.0	0.0	0.0	20.0	29.999999999999996	59.0	59.99999999999999	306.67542	3987.77979	578.60699	202.04857	440.27551	21.063710559913805	8.887028379157352
97	20.0	25.0	0.0	0.0	0.0	0.0	0.0	0.0	0.0	0.0	0.0	0.0	0.0	0.0	0.0	0.0	0.0	19.0	0.0	0.0	0.0	0.0	0.0	0.0	0.0	20.0	29.999999999999996	106.0	59.99999999999999	462.49176	5411.56299	780.99347	572.45819	876.81311	27.815851140612757	16.696272653398193
98	20.0	25.0	0.0	0.0	0.0	0.0	0.0	0.0	0.0	0.0	0.0	0.0	0.0	0.0	0.0	0.0	0.0	19.0	0.0	0.0	0.0	0.0	0.0	0.0	0.0	20.0	29.999999999999996	106.0	59.99999999999999	323.52753	3935.59619	488.22525	432.11258	673.51044	30.543753651134416	18.016292436133643
99	20.0	25.0	0.0	0.0	0.0	0.0	0.0	0.0	0.0	0.0	0.0	0.0	0.0	0.0	0.0	0.0	0.0	19.0	0.0	0.0	0.0	0.0	0.0	0.0	0.0	20.0	29.999999999999996	106.0	59.99999999999999	480.51883	5266.29785	708.13855	657.4588	993.72522	30.342070939946314	18.456012958326735
100	20.0	25.0	0.0	0.0	0.0	0.0	0.0	0.0	0.0	0.0	0.0	0.0	0.0	0.0	0.0	0.0	0.0	19.0	0.0	0.0	0.0	0.0	0.0	0.0	0.0	20.0	29.999999999999996	106.0	59.99999999999999	456.62222	4797.26025	824.14331	577.33826	873.93188	28.08082476441904	17.055052181078704
101	20.0	25.0	0.0	0.0	0.0	0.0	0.0	0.0	0.0	0.0	0.0	0.0	0.0	0.0	0.0	0.0	0.0	19.0	0.0	0.0	0.0	0.0	0.0	0.0	0.0	20.0	29.999999999999996	106.0	59.99999999999999	474.45535	5360.95654	816.20514	538.04657	817.86188	25.291462101460127	15.296929801149886
102	20.0	25.0	0.0	0.0	0.0	0.0	0.0	0.0	0.0	0.0	0.0	0.0	0.0	0.0	0.0	0.0	0.0	19.0	0.0	0.0	0.0	0.0	0.0	0.0	0.0	20.0	29.999999999999996	106.0	59.99999999999999	477.4187	4827.31055	769.00317	579.85596	886.08105	27.230984386661017	16.383264929589057
103	20.0	25.0	0.0	0.0	0.0	0.0	0.0	0.0	0.0	0.0	0.0	0.0	0.0	0.0	0.0	0.0	0.0	19.0	0.0	0.0	0.0	0.0	0.0	0.0	0.0	20.0	29.999999999999996	106.0	59.99999999999999	466.25665	5058.55518	752.24554	578.84186	878.86633	27.655856047865484	16.746137239093535
104	20.0	25.0	0.0	0.0	0.0	0.0	0.0	0.0	0.0	0.0	0.0	0.0	0.0	0.0	0.0	0.0	0.0	19.0	0.0	0.0	0.0	0.0	0.0	0.0	0.0	20.0	29.999999999999996	106.0	59.99999999999999	395.31924	4801.84277	605.18457	525.69366	766.40704	28.4446668744987	17.93760855085121
105	22.37819480895996	25.0	0.0	0.0	0.0	0.0	0.0	0.0	0.0	0.0	0.0	0.0	0.0	0.0	0.0	0.0	0.0	0.0	0.0	0.0	0.0	0.0	0.0	34.0	0.0	20.0	29.999999999999996	91.0	59.99999999999999	394.71521	4345.73682	426.28915	1768.18738	182.77682	6.794016128843881	60.426046335584594
106	22.37819480895996	14.0	0.0	0.0	0.0	0.0	0.0	12.0	0.0	0.0	0.0	0.0	0.0	0.0	0.0	0.0	0.0	0.0	0.0	0.0	0.0	0.0	0.0	0.0	0.0	20.0	29.999999999999996	124.0	59.99999999999999	466.95316	5784.55225	891.40265	665.19531	345.22806	10.847310887284712	19.215673658981125
107	22.37819480895996	38.0	0.0	0.0	0.0	0.0	0.0	0.0	0.0	0.0	0.0	0.0	0.0	0.0	0.0	0.0	0.0	0.0	0.0	0.0	0.0	0.0	14.0	0.0	0.0	20.0	29.999999999999996	98.0	59.99999999999999	339.6066	3006.45142	139.17715	843.42395	1282.57947	55.41119042986797	33.50036678188822
108	22.37819480895996	48.0	0.0	0.0	0.0	0.0	0.0	0.0	0.0	0.0	0.0	0.0	0.0	0.0	0.0	0.0	0.0	0.0	0.0	0.0	0.0	0.0	17.0	0.0	0.0	20.0	29.999999999999996	85.0	59.99999999999999	386.2363	3330.63135	78.79259	1056.02295	1555.61584	59.09334675295926	36.8807736935912
109	22.37819480895996	47.0	0.0	0.0	0.0	0.0	0.0	0.0	0.0	0.0	0.0	0.0	0.0	0.0	0.0	0.0	0.0	0.0	0.0	0.0	0.0	0.0	38.0	0.0	0.0	20.0	29.999999999999996	65.0	59.99999999999999	513.90594	3781.29077	370.6326	840.19104	1920.16248	54.82058430101041	22.053329328242445
110	22.37819480895996	20.0	0.0	0.0	0.0	17.0	0.0	0.0	0.0	0.0	0.0	0.0	0.0	0.0	0.0	0.0	0.0	0.0	0.0	0.0	0.0	0.0	0.0	0.0	0.0	20.0	29.999999999999996	113.0	59.99999999999999	446.7117	4407.37354	299.63458	1487.96863	1071.96704	35.208167618802015	44.931012216760834
111	22.37819480895996	13.0	0.0	0.0	0.0	0.0	0.0	0.0	0.0	11.0	0.0	0.0	0.0	0.0	0.0	0.0	0.0	0.0	0.0	0.0	0.0	0.0	0.0	0.0	0.0	20.0	29.999999999999996	126.0	59.99999999999999	439.92401	6054.02686	1173.7821	124.27854	56.33821	1.8789477235397996	3.810642720000666
112	22.37819480895996	47.0	0.0	0.0	0.0	0.0	0.0	0.0	0.0	0.0	0.0	0.0	0.0	0.0	0.0	0.0	0.0	0.0	0.0	0.0	0.0	0.0	37.0	0.0	0.0	20.0	29.999999999999996	66.0	59.99999999999999	458.31558	3898.9458	298.68961	777.87311	1771.49609	56.710685315301745	22.894116714928174
113	27.856409072875977	42.0	0.0	0.0	0.0	0.0	0.0	0.0	0.0	0.0	0.0	0.0	0.0	0.0	0.0	0.0	0.0	0.0	0.0	0.0	0.0	0.0	32.0	0.0	0.0	20.0	29.999999999999996	76.0	59.99999999999999	508.28366	4114.24414	210.96298	993.64606	2203.86401	63.61623498721166	26.369708015677706
114	27.856409072875977	17.0	0.0	0.0	0.0	0.0	0.0	0.0	0.0	0.0	0.0	0.0	0.0	0.0	0.0	0.0	33.0	0.0	0.0	0.0	0.0	0.0	0.0	0.0	0.0	20.0	29.999999999999996	100.0	59.99999999999999	311.89215	4509.15137	814.73944	35.07078	33.85365	1.592540090540913	1.5167735110357858
115	27.856409072875977	17.0	0.0	0.0	0.0	0.0	0.0	0.0	0.0	0.0	0.0	0.0	0.0	0.0	0.0	0.0	0.0	0.0	0.0	33.0	0.0	0.0	0.0	0.0	0.0	20.0	29.999999999999996	100.0	59.99999999999999	392.77621	4479.03516	296.68881	1134.01331	1022.46637	38.193826913906015	38.94509175744122
116	27.856409072875977	16.0	0.0	0.0	0.0	0.0	0.0	0.0	0.0	0.0	0.0	0.0	0.0	0.0	0.0	0.0	0.0	0.0	0.0	0.0	0.0	0.0	0.0	0.0	31.0	20.0	29.999999999999996	103.0	59.99999999999999	499.30548	6230.11572	1365.00854	0.0	0.0	0.0	0.0
117	27.856409072875977	44.0	0.0	0.0	0.0	0.0	0.0	0.0	0.0	0.0	0.0	0.0	0.0	0.0	0.0	0.0	0.0	0.0	0.0	0.0	0.0	0.0	35.0	0.0	0.0	20.0	29.999999999999996	71.0	59.99999999999999	407.02075	3615.15601	116.8421	825.29395	1853.64795	66.81900793116813	27.35091538097259
118	27.856409072875977	39.0	0.0	0.0	0.0	0.0	0.0	0.0	0.0	0.0	0.0	0.0	0.0	0.0	0.0	0.0	0.0	0.0	0.0	0.0	0.0	0.0	33.0	0.0	0.0	20.0	29.999999999999996	78.0	59.99999999999999	375.46835	3348.5752	122.06266	734.5647	1681.28247	65.69868379009843	26.389822839395123
119	27.856409072875977	16.0	0.0	32.0	0.0	0.0	0.0	0.0	0.0	0.0	0.0	0.0	0.0	0.0	0.0	0.0	0.0	0.0	0.0	0.0	0.0	0.0	0.0	0.0	0.0	20.0	29.999999999999996	102.0	59.99999999999999	493.62646	5794.76172	1341.82361	0.0	0.0	0.0	0.0
120	27.856409072875977	40.0	0.0	0.0	0.0	0.0	0.0	0.0	0.0	0.0	0.0	0.0	0.0	0.0	0.0	0.0	0.0	0.0	0.0	0.0	0.0	0.0	30.0	0.0	0.0	20.0	29.999999999999996	80.0	59.99999999999999	457.93362	4260.14795	149.65581	908.31226	2063.1062	66.10105230185984	26.755458739063535
121	39.065860748291016	41.0	0.0	11.0	0.0	0.0	0.0	0.0	0.0	0.0	0.0	0.0	0.0	0.0	0.0	0.0	0.0	0.0	0.0	0.0	0.0	0.0	0.0	0.0	0.0	20.0	29.999999999999996	98.0	59.99999999999999	479.01447	3636.87061	35.32097	2694.28467	904.70349	27.710665202410272	75.87078927621957
122	39.065860748291016	48.0	0.0	0.0	0.0	0.0	0.0	0.0	0.0	0.0	0.0	0.0	0.0	0.0	0.0	0.0	0.0	0.0	0.0	0.0	0.0	0.0	15.0	0.0	0.0	20.0	29.999999999999996	87.0	59.99999999999999	449.91254	3327.00537	6.42724	1417.6167	1885.09814	61.47452549351036	42.502108668275845
123	39.065860748291016	44.0	0.0	0.0	0.0	0.0	0.0	0.0	0.0	0.0	0.0	0.0	0.0	0.0	0.0	0.0	0.0	0.0	0.0	0.0	0.0	0.0	15.0	0.0	0.0	20.0	29.999999999999996	91.0	59.99999999999999	501.98514	2445.60522	11.94722	1492.64673	2176.93628	63.62739960820355	40.10937802057248
124	39.065860748291016	33.0	0.0	0.0	0.0	65.0	0.0	0.0	0.0	0.0	0.0	0.0	0.0	0.0	0.0	0.0	0.0	0.0	0.0	0.0	0.0	0.0	0.0	0.0	0.0	20.0	29.999999999999996	52.0	59.99999999999999	508.55759	4326.15625	397.71002	1525.73682	1149.73938	33.17023777653186	40.468698864527816
125	39.065860748291016	26.0	0.0	0.0	0.0	0.0	0.0	0.0	0.0	0.0	0.0	0.0	52.0	0.0	0.0	0.0	0.0	0.0	0.0	0.0	0.0	0.0	0.0	0.0	0.0	20.0	29.999999999999996	72.0	59.99999999999999	445.43997	4847.37842	806.34448	244.70747	683.87024	22.52546883316286	7.410334242861052
126	39.065860748291016	26.0	0.0	0.0	0.0	0.0	0.0	0.0	0.0	0.0	0.0	0.0	0.0	0.0	0.0	0.0	0.0	0.0	0.0	50.0	0.0	0.0	0.0	0.0	0.0	20.0	29.999999999999996	74.0	59.99999999999999	454.53671	3382.51099	109.35926	1694.64856	1409.87427	45.50936114585772	50.29101923547606
127	39.065860748291016	29.0	0.0	0.0	0.0	0.0	0.0	0.0	0.0	0.0	0.0	0.0	0.0	0.0	0.0	0.0	0.0	0.0	0.0	0.0	0.0	0.0	0.0	57.0	0.0	20.0	29.999999999999996	64.0	59.99999999999999	458.90497	6056.43555	1230.96533	5.66033	0.0	0.0	0.1663790901414731
128	39.065860748291016	27.0	0.0	0.0	0.0	0.0	0.0	0.0	0.0	0.0	0.0	0.0	0.0	0.0	0.0	0.0	0.0	54.0	0.0	0.0	0.0	0.0	0.0	0.0	0.0	20.0	29.999999999999996	69.0	59.99999999999999	469.58212	5692.53369	1195.3075	102.37498	149.56212	4.673038710758409	2.9407765892364046
129	31.771570205688477	41.0	0.0	0.0	0.0	0.0	0.0	0.0	0.0	0.0	0.0	0.0	0.0	0.0	0.0	0.0	0.0	0.0	0.0	0.0	0.0	0.0	42.0	0.0	0.0	20.0	29.999999999999996	67.0	59.99999999999999	522.15228	4152.65869	130.53435	1073.74731	2468.0813	69.35082009715633	27.73860810219961
130	31.771570205688477	44.0	0.0	0.0	0.0	0.0	41.0	0.0	0.0	0.0	0.0	0.0	0.0	0.0	0.0	0.0	0.0	0.0	0.0	0.0	0.0	0.0	0.0	0.0	0.0	20.0	29.999999999999996	65.0	59.99999999999999	500.58212	4609.25293	224.63298	1539.78687	1555.20007	45.58272162625386	41.49206345889861
131	31.771570205688477	48.0	0.0	0.0	0.0	0.0	0.0	0.0	74.0	0.0	0.0	0.0	0.0	0.0	0.0	0.0	0.0	0.0	0.0	0.0	0.0	0.0	0.0	0.0	0.0	20.0	29.999999999999996	28.0	59.99999999999999	463.58969	6052.18994	689.96606	123.77408	13.04349	0.41280919185239	3.60143592736068
132	31.771570205688477	42.0	0.0	0.0	0.0	0.0	0.0	0.0	0.0	0.0	0.0	0.0	0.0	0.0	0.0	0.0	0.0	0.0	0.0	0.0	0.0	0.0	41.0	0.0	0.0	20.0	29.999999999999996	67.0	59.99999999999999	450.81613	3312.75415	76.62003	934.23907	2129.25049	69.29735009543691	27.953637806238216
133	31.771570205688477	41.0	0.0	0.0	0.0	0.0	0.0	0.0	0.0	0.0	0.0	0.0	0.0	0.0	0.0	0.0	0.0	0.0	0.0	0.0	0.0	0.0	42.0	0.0	0.0	20.0	29.999999999999996	67.0	59.99999999999999	536.0722	3606.41211	143.91896	1073.26904	2464.36963	67.44843551178369	27.006298928689084
134	31.771570205688477	41.0	0.0	0.0	0.0	0.0	0.0	0.0	0.0	0.0	0.0	0.0	0.0	0.0	0.0	0.0	0.0	0.0	0.0	0.0	0.0	0.0	42.0	0.0	0.0	20.0	29.999999999999996	67.0	59.99999999999999	500.32538	3582.77466	97.2246	1028.13123	2360.03735	69.20789826652408	27.7188859806992
135	31.771570205688477	48.0	0.0	0.0	0.0	0.0	0.0	0.0	0.0	74.0	0.0	0.0	0.0	0.0	0.0	0.0	0.0	0.0	0.0	0.0	0.0	0.0	0.0	0.0	0.0	20.0	29.999999999999996	28.0	59.99999999999999	474.35776	6040.61328	1197.10706	197.43835	111.11065	3.436679220342048	5.614424655243335
136	31.771570205688477	41.0	0.0	0.0	0.0	0.0	0.0	0.0	0.0	0.0	0.0	0.0	0.0	0.0	0.0	0.0	0.0	0.0	0.0	0.0	0.0	0.0	39.0	0.0	0.0	20.0	29.999999999999996	70.0	59.99999999999999	482.95969	3727.39404	77.77258	1039.78943	2372.82056	72.08473911418984	29.041180685845646
137	17.557064056396484	49.0	0.0	0.0	0.0	0.0	0.0	0.0	0.0	0.0	0.0	0.0	0.0	0.0	0.0	0.0	0.0	0.0	0.0	0.0	0.0	0.0	51.0	0.0	0.0	20.0	29.999999999999996	50.0	59.99999999999999	540.6911	4344.57373	674.5462	665.39069	1528.69202	41.48203903752068	16.599968110090956
138	17.557064056396484	47.0	0.0	0.0	0.0	0.0	0.0	0.0	0.0	0.0	0.0	0.0	0.0	0.0	0.0	0.0	0.0	0.0	0.0	0.0	0.0	0.0	12.0	0.0	0.0	20.0	29.999999999999996	91.0	59.99999999999999	340.23581	2649.32544	193.52354	935.13605	1055.59192	45.52032500705908	37.074434282652376
139	17.557064056396484	40.0	41.0	0.0	0.0	0.0	0.0	0.0	0.0	0.0	0.0	0.0	0.0	0.0	0.0	0.0	0.0	0.0	0.0	0.0	0.0	0.0	0.0	0.0	0.0	20.0	29.999999999999996	69.0	59.99999999999999	531.19751	5780.28955	1334.10522	113.36266	185.81171	5.132233035354402	2.878682395819213
140	17.557064056396484	37.0	0.0	0.0	0.0	0.0	0.0	0.0	0.0	0.0	0.0	0.0	0.0	0.0	0.0	0.0	0.0	0.0	48.0	0.0	0.0	0.0	0.0	0.0	0.0	20.0	29.999999999999996	65.0	59.99999999999999	509.2652	5419.31982	966.90381	682.42584	407.24164	11.732687295499478	18.075537373769112
141	17.557064056396484	19.0	0.0	0.0	0.0	0.0	0.0	0.0	0.0	0.0	0.0	6.0	0.0	0.0	0.0	0.0	0.0	0.0	0.0	0.0	0.0	0.0	0.0	0.0	0.0	20.0	29.999999999999996	125.0	59.99999999999999	459.36844	4574.32324	550.52515	1034.49768	933.96185	29.830277986010532	30.37722662340495
142	17.557064056396484	19.0	0.0	0.0	0.0	0.0	0.0	0.0	0.0	0.0	0.0	0.0	0.0	0.0	0.0	5.0	0.0	0.0	0.0	0.0	0.0	0.0	0.0	0.0	0.0	20.0	29.999999999999996	126.0	59.99999999999999	508.57986	4411.73926	272.55536	2687.16797	501.96527	14.48117595816712	71.2714198854237
143	17.557064056396484	38.0	0.0	0.0	0.0	0.0	0.0	0.0	0.0	38.0	0.0	0.0	0.0	0.0	0.0	0.0	0.0	0.0	0.0	0.0	0.0	0.0	0.0	0.0	0.0	20.0	29.999999999999996	74.0	59.99999999999999	458.42334	5953.88721	1154.01233	181.80142	87.39088	2.796975807034607	5.349464436911088
144	17.557064056396484	19.0	0.0	0.0	0.0	0.0	0.0	0.0	0.0	0.0	0.0	0.0	0.0	0.0	0.0	0.0	0.0	0.0	6.0	0.0	0.0	0.0	0.0	0.0	0.0	20.0	29.999999999999996	125.0	59.99999999999999	452.16141	4890.96582	438.52924	1741.10242	547.58911	17.768494268274686	51.941032613508526
145	33.84888458251953	41.0	0.0	0.0	0.0	0.0	0.0	0.0	0.0	0.0	58.0	0.0	0.0	0.0	0.0	0.0	0.0	0.0	0.0	0.0	0.0	0.0	0.0	0.0	0.0	20.0	29.999999999999996	51.0	59.99999999999999	533.55127	4272.33691	18.15524	3858.99951	103.17073	2.8370674678742684	97.56146656794576
146	33.84888458251953	42.0	0.0	0.0	0.0	0.0	0.0	0.0	0.0	0.0	0.0	0.0	0.0	0.0	0.0	0.0	0.0	0.0	0.0	0.0	0.0	0.0	38.0	0.0	0.0	20.0	29.999999999999996	70.0	59.99999999999999	534.04236	3259.5686	59.75473	1142.01196	2596.67554	71.3397033203134	28.84527610963295
147	33.84888458251953	38.0	0.0	0.0	0.0	0.0	0.0	0.0	0.0	0.0	0.0	0.0	0.0	0.0	0.0	0.0	0.0	0.0	0.0	0.0	0.0	0.0	33.0	0.0	0.0	20.0	29.999999999999996	79.0	59.99999999999999	360.19455	2631.03003	67.57956	730.31512	1677.03162	68.31143871732651	27.349721570412438
148	33.84888458251953	38.0	50.0	0.0	0.0	0.0	0.0	0.0	0.0	0.0	0.0	0.0	0.0	0.0	0.0	0.0	0.0	0.0	0.0	0.0	0.0	0.0	0.0	0.0	0.0	20.0	29.999999999999996	62.0	59.99999999999999	480.13281	6178.13037	1302.40808	0.0	0.0	0.0	0.0
149	33.84888458251953	39.0	0.0	0.0	0.0	0.0	0.0	0.0	0.0	0.0	0.0	0.0	0.0	0.0	0.0	0.0	0.0	0.0	0.0	0.0	0.0	61.0	0.0	0.0	0.0	20.0	29.999999999999996	50.0	59.99999999999999	332.33817	4683.17578	842.35004	147.3154	20.54228	0.9068965269923706	5.979263322657161
150	33.84888458251953	36.0	0.0	0.0	0.0	0.0	0.0	0.0	0.0	0.0	0.0	0.0	0.0	0.0	0.0	0.0	0.0	0.0	0.0	0.0	0.0	58.0	0.0	0.0	0.0	20.0	29.999999999999996	56.0	59.99999999999999	468.73419	5759.79736	1187.80969	242.60905	32.10653	1.0049768466004154	6.981682892493931
151	33.84888458251953	39.0	0.0	0.0	61.0	0.0	0.0	0.0	0.0	0.0	0.0	0.0	0.0	0.0	0.0	0.0	0.0	0.0	0.0	0.0	0.0	0.0	0.0	0.0	0.0	20.0	29.999999999999996	50.0	59.99999999999999	463.27148	6106.89502	1151.67322	85.74081	126.86549	4.017882709464438	2.496501157571798
152	33.84888458251953	45.0	0.0	0.0	0.0	0.0	0.0	0.0	0.0	0.0	0.0	0.0	0.0	0.0	0.0	0.0	0.0	0.0	0.0	0.0	0.0	0.0	42.0	0.0	0.0	20.0	29.999999999999996	63.0	59.99999999999999	500.8895	3744.66968	18.56729	1102.67151	2481.96875	72.70155493377281	29.695044512592098
153	16.66618537902832	28.0	0.0	0.0	0.0	0.0	0.0	56.0	0.0	0.0	0.0	0.0	0.0	0.0	0.0	0.0	0.0	0.0	0.0	0.0	0.0	0.0	0.0	0.0	0.0	20.0	29.999999999999996	66.0	59.99999999999999	591.84631	6602.521	1639.47571	13.10384	10.56507	0.2619104054902362	0.2986547263596186
154	16.66618537902832	50.0	0.0	0.0	0.0	0.0	0.0	0.0	0.0	0.0	0.0	0.0	0.0	0.0	78.0	0.0	0.0	0.0	0.0	0.0	0.0	0.0	0.0	0.0	0.0	20.0	29.999999999999996	22.0	59.99999999999999	508.96332	3028.21191	124.94509	3515.4834	95.84153	2.762845322841733	93.17047755543562
155	16.66618537902832	28.0	0.0	0.0	0.0	0.0	0.0	0.0	0.0	0.0	0.0	0.0	0.0	0.0	0.0	0.0	0.0	0.0	0.0	0.0	0.0	56.0	0.0	0.0	0.0	20.0	29.999999999999996	66.0	59.99999999999999	357.05557	5006.48193	961.24908	27.3034	0.0	0.0	1.0314796730380094
156	16.66618537902832	49.0	0.0	0.0	0.0	0.0	0.0	0.0	0.0	0.0	0.0	0.0	0.0	0.0	0.0	16.0	0.0	0.0	0.0	0.0	0.0	0.0	0.0	0.0	0.0	20.0	29.999999999999996	85.0	59.99999999999999	501.92963	4659.25391	165.1577	2381.70947	966.25317	28.24472926661054	64.00673943243797
157	16.66618537902832	28.0	0.0	0.0	0.0	0.0	0.0	0.0	0.0	54.0	0.0	0.0	0.0	0.0	0.0	0.0	0.0	0.0	0.0	0.0	0.0	0.0	0.0	0.0	0.0	20.0	29.999999999999996	68.0	59.99999999999999	510.93887	6394.2915	1345.40491	115.21244	64.95467	1.8652229732296548	3.0416566333268014
158	16.66618537902832	42.0	0.0	0.0	0.0	0.0	0.0	0.0	0.0	0.0	0.0	0.0	0.0	0.0	0.0	0.0	0.0	0.0	0.0	0.0	0.0	0.0	12.0	0.0	0.0	20.0	29.999999999999996	96.0	59.99999999999999	494.22781	4686.12891	275.87216	1207.1189	1694.96191	50.31785067602732	32.945994767271394
159	16.66618537902832	50.0	0.0	0.0	76.0	0.0	0.0	0.0	0.0	0.0	0.0	0.0	0.0	0.0	0.0	0.0	0.0	0.0	0.0	0.0	0.0	0.0	0.0	0.0	0.0	20.0	29.999999999999996	24.0	59.99999999999999	351.26355	4841.07617	949.87433	10.18803	11.16595	0.46639287907897076	0.39123426461413374
160	16.66618537902832	50.0	0.0	0.0	0.0	0.0	0.0	0.0	0.0	0.0	0.0	0.0	0.0	0.0	0.0	0.0	0.0	0.0	0.0	0.0	81.0	0.0	0.0	0.0	0.0	20.0	29.999999999999996	19.0	59.99999999999999	494.03766	3829.20264	616.72198	2162.27612	347.56064	10.321904832275337	59.03789314903646
161	35.0504264831543	38.0	0.0	0.0	0.0	0.0	0.0	0.0	0.0	0.0	0.0	0.0	0.0	0.0	0.0	0.0	0.0	0.0	0.0	0.0	0.0	0.0	46.0	0.0	0.0	20.0	29.999999999999996	66.0	59.99999999999999	598.047	4550.23877	96.05484	1303.64978	2974.75977	72.98034325971037	29.403929594864618
162	35.0504264831543	45.0	0.0	0.0	0.0	0.0	0.0	0.0	0.0	0.0	0.0	0.0	0.0	0.0	0.0	0.0	0.0	0.0	0.0	0.0	0.0	0.0	52.0	0.0	0.0	20.0	29.999999999999996	53.0	59.99999999999999	531.4021	4345.47998	37.59737	1151.96057	2616.71509	72.24744463840095	29.241126688678875
163	35.0504264831543	38.0	0.0	0.0	0.0	0.0	0.0	0.0	0.0	0.0	0.0	0.0	0.0	0.0	0.0	0.0	0.0	0.0	0.0	0.0	0.0	0.0	23.0	0.0	0.0	20.0	29.999999999999996	89.0	59.99999999999999	508.1669	3976.07544	32.54489	1151.6676	2518.99316	72.72938800917574	30.570358392882337
164	35.0504264831543	45.0	0.0	0.0	0.0	0.0	0.0	0.0	0.0	0.0	0.0	0.0	0.0	0.0	0.0	0.0	0.0	0.0	0.0	0.0	0.0	0.0	52.0	0.0	0.0	20.0	29.999999999999996	53.0	59.99999999999999	457.76074	3771.6333	12.7645	1002.65002	2276.33057	72.96021524921514	29.545447955584834
165	35.0504264831543	40.0	0.0	0.0	0.0	0.0	0.0	0.0	0.0	0.0	0.0	0.0	21.0	0.0	0.0	0.0	0.0	0.0	0.0	0.0	0.0	0.0	0.0	0.0	0.0	20.0	29.999999999999996	89.0	59.99999999999999	444.05905	4753.10742	446.1377	1372.74536	589.4176	19.474741089501496	41.69932390982686
166	35.0504264831543	42.0	0.0	0.0	0.0	0.0	0.0	0.0	0.0	0.0	0.0	0.0	0.0	0.0	0.0	0.0	0.0	0.0	0.0	0.0	0.0	0.0	38.0	0.0	0.0	20.0	29.999999999999996	70.0	59.99999999999999	503.2778	4166.12402	26.75586	1096.14758	2486.78101	72.49684166223904	29.379270666458964
167	35.0504264831543	17.0	0.0	0.0	0.0	0.0	0.0	0.0	0.0	0.0	0.0	0.0	0.0	0.0	0.0	0.0	0.0	0.0	0.0	0.0	0.0	0.0	0.0	0.0	21.0	20.0	29.999999999999996	112.0	59.99999999999999	529.45062	6355.97852	1444.8811	0.0	0.0	0.0	0.0
168	35.0504264831543	17.0	0.0	0.0	0.0	0.0	0.0	0.0	0.0	19.0	0.0	0.0	0.0	0.0	0.0	0.0	0.0	0.0	0.0	0.0	0.0	0.0	0.0	0.0	0.0	20.0	29.999999999999996	114.0	59.99999999999999	553.24054	6411.07764	1428.44873	181.41913	81.95994	2.1735866277623113	4.423324878849262
169	11.256270408630371	42.0	11.0	0.0	0.0	0.0	0.0	0.0	0.0	0.0	0.0	0.0	0.0	0.0	0.0	0.0	0.0	0.0	0.0	0.0	0.0	0.0	0.0	0.0	0.0	20.0	29.999999999999996	97.0	59.99999999999999	530.04895	4580.4082	469.55539	2270.07471	552.79669	15.301667960440257	57.770207380261766
170	11.256270408630371	20.0	0.0	0.0	0.0	0.0	0.0	0.0	0.0	0.0	0.0	0.0	0.0	0.0	0.0	0.0	0.0	0.0	0.0	0.0	0.0	0.0	29.0	0.0	0.0	20.0	29.999999999999996	101.0	59.99999999999999	561.4364	6396.54785	1171.39844	302.90497	687.18903	17.958289573244627	7.277556532369472
171	11.256270408630371	19.0	0.0	0.0	0.0	0.0	0.0	0.0	0.0	0.0	0.0	0.0	0.0	0.0	0.0	0.0	0.0	10.0	0.0	0.0	0.0	0.0	0.0	0.0	0.0	20.0	29.999999999999996	121.0	59.99999999999999	386.0199	4251.02344	658.11066	407.47018	656.63055	24.95747869371501	14.238554173036158
172	11.256270408630371	39.0	0.0	0.0	0.0	0.0	0.0	0.0	0.0	0.0	0.0	0.0	0.0	29.0	0.0	0.0	0.0	0.0	0.0	0.0	0.0	0.0	0.0	0.0	0.0	20.0	29.999999999999996	82.0	59.99999999999999	528.88672	5560.84863	971.11328	944.435	370.21634	10.270278937009424	24.087357903408883
173	11.256270408630371	39.0	0.0	0.0	0.0	0.0	0.0	0.0	0.0	0.0	0.0	0.0	0.0	0.0	0.0	0.0	0.0	0.0	0.0	29.0	0.0	0.0	0.0	0.0	0.0	20.0	29.999999999999996	82.0	59.99999999999999	513.38177	4253.16455	210.0779	1837.50098	1469.74805	42.004108150548475	48.27995882911854
174	11.256270408630371	20.0	0.0	0.0	0.0	0.0	0.0	0.0	0.0	0.0	0.0	0.0	0.0	0.0	0.0	0.0	0.0	0.0	0.0	0.0	0.0	0.0	29.0	0.0	0.0	20.0	29.999999999999996	101.0	59.99999999999999	557.69128	6173.07764	1172.22546	294.38129	669.69342	17.61860407471316	7.120264137552948
175	11.256270408630371	22.0	0.0	0.0	0.0	0.0	0.0	0.0	0.0	0.0	32.0	0.0	0.0	0.0	0.0	0.0	0.0	0.0	0.0	0.0	0.0	0.0	0.0	0.0	0.0	20.0	29.999999999999996	96.0	59.99999999999999	527.15948	4457.52344	92.24482	3762.86304	82.72123	2.30231254981889	96.28444801288597
176	11.256270408630371	46.0	0.0	0.0	0.0	0.0	0.0	0.0	0.0	0.0	0.0	0.0	0.0	0.0	0.0	0.0	0.0	0.0	0.0	0.0	0.0	0.0	14.0	0.0	0.0	20.0	29.999999999999996	90.0	59.99999999999999	511.7182	4499.35107	425.48059	1034.30896	1588.60779	45.548611510944895	27.264602981562906
177	29.839813232421875	11.0	0.0	0.0	0.0	0.0	0.0	0.0	0.0	0.0	0.0	0.0	0.0	0.0	0.0	0.0	0.0	0.0	0.0	0.0	0.0	14.0	0.0	0.0	0.0	20.0	29.999999999999996	125.0	59.99999999999999	515.47607	6051.18506	1139.32922	782.09674	95.99097	2.732191839361233	20.465941175232437
178	29.839813232421875	41.0	0.0	0.0	0.0	0.0	0.0	0.0	0.0	0.0	0.0	0.0	0.0	0.0	0.0	0.0	0.0	25.0	0.0	0.0	0.0	0.0	0.0	0.0	0.0	20.0	29.999999999999996	84.0	59.99999999999999	585.02008	5476.52783	446.75836	1350.78479	1797.995	45.09278149905555	31.145488257958597
179	29.839813232421875	39.0	0.0	0.0	0.0	0.0	0.0	0.0	0.0	0.0	0.0	0.0	0.0	0.0	0.0	0.0	0.0	0.0	0.0	0.0	29.0	0.0	0.0	0.0	0.0	20.0	29.999999999999996	82.0	59.99999999999999	510.00934	3544.50171	80.60474	3366.63013	336.99319	9.694653991395532	89.04243562200253
180	29.839813232421875	11.0	0.0	0.0	0.0	0.0	0.0	0.0	0.0	0.0	0.0	0.0	0.0	14.0	0.0	0.0	0.0	0.0	0.0	0.0	0.0	0.0	0.0	0.0	0.0	20.0	29.999999999999996	125.0	59.99999999999999	540.51996	6603.40967	1433.49646	74.20111	5.21972	0.14168529843005245	1.8517332325525964
181	29.839813232421875	19.0	0.0	0.0	0.0	0.0	22.0	0.0	0.0	0.0	0.0	0.0	0.0	0.0	0.0	0.0	0.0	0.0	0.0	0.0	0.0	0.0	0.0	0.0	0.0	20.0	29.999999999999996	109.0	59.99999999999999	442.1748	5737.98682	1105.8053	177.53793	89.32981	2.964092418473418	5.415978336553779
182	29.839813232421875	42.0	0.0	0.0	0.0	0.0	0.0	0.0	0.0	0.0	0.0	0.0	0.0	0.0	0.0	0.0	0.0	0.0	0.0	0.0	0.0	0.0	0.0	31.0	0.0	20.0	29.999999999999996	77.0	59.99999999999999	559.05853	4729.55371	203.15305	3334.86182	352.99652	9.264083568208859	80.46375947430764
183	29.839813232421875	18.0	0.0	0.0	0.0	0.0	0.0	0.0	0.0	0.0	0.0	0.0	0.0	0.0	0.0	22.0	0.0	0.0	0.0	0.0	0.0	0.0	0.0	0.0	0.0	20.0	29.999999999999996	110.0	59.99999999999999	544.53741	5756.2002	769.92505	1502.42651	495.17499	13.34198040366042	37.21733497316557
184	29.839813232421875	38.0	0.0	0.0	0.0	0.0	0.0	0.0	0.0	0.0	0.0	0.0	0.0	0.0	0.0	0.0	0.0	0.0	0.0	0.0	0.0	0.0	33.0	0.0	0.0	20.0	29.999999999999996	79.0	59.99999999999999	558.52405	4796.91895	187.02603	1148.63354	2586.74146	67.95172150799954	27.74082480612966
185	21.921567916870117	32.0	0.0	0.0	0.0	0.0	0.0	0.0	0.0	0.0	0.0	0.0	0.0	0.0	0.0	0.0	0.0	0.0	0.0	33.0	0.0	0.0	0.0	0.0	0.0	20.0	29.999999999999996	85.0	59.99999999999999	581.88818	3981.77271	97.21861	2269.83496	1952.63525	49.23465602618015	52.61801979796187
186	21.921567916870117	43.0	0.0	0.0	0.0	0.0	0.0	0.0	0.0	0.0	0.0	0.0	0.0	0.0	0.0	0.0	0.0	0.0	0.0	0.0	0.0	0.0	21.0	0.0	0.0	20.0	29.999999999999996	86.0	59.99999999999999	418.366	3549.62769	200.27126	766.1488	1671.8855	58.63264236577543	24.702249138792354
187	21.921567916870117	30.0	0.0	0.0	0.0	0.0	0.0	0.0	0.0	0.0	0.0	0.0	0.0	0.0	0.0	0.0	0.0	0.0	0.0	0.0	0.0	0.0	0.0	0.0	21.0	20.0	29.999999999999996	99.0	59.99999999999999	606.62933	5998.51367	1114.17017	997.16089	498.70804	12.06180446777936	22.17285347085015
188	21.921567916870117	30.0	0.0	0.0	0.0	0.0	0.0	0.0	0.0	0.0	21.0	0.0	0.0	0.0	0.0	0.0	0.0	0.0	0.0	0.0	0.0	0.0	0.0	0.0	0.0	20.0	29.999999999999996	99.0	59.99999999999999	579.89502	3862.95703	16.50617	4276.61963	99.35279	2.513737977746386	99.4789060079702
189	21.921567916870117	30.0	0.0	0.0	0.0	0.0	0.0	0.0	0.0	0.0	0.0	0.0	21.0	0.0	0.0	0.0	0.0	0.0	0.0	0.0	0.0	0.0	0.0	0.0	0.0	20.0	29.999999999999996	99.0	59.99999999999999	559.14917	5783.0835	675.513	2074.19238	332.8486	8.73390308207021	50.03813385580094
190	21.921567916870117	46.0	33.0	0.0	0.0	0.0	0.0	0.0	0.0	0.0	0.0	0.0	0.0	0.0	0.0	0.0	0.0	0.0	0.0	0.0	0.0	0.0	0.0	0.0	0.0	20.0	29.999999999999996	71.0	59.99999999999999	425.56006	4315.93311	549.42651	876.51324	694.14191	23.931874865136546	27.78288708381139
191	21.921567916870117	26.0	0.0	0.0	0.0	0.0	0.0	13.0	0.0	0.0	0.0	0.0	0.0	0.0	0.0	0.0	0.0	0.0	0.0	0.0	0.0	0.0	0.0	0.0	0.0	20.0	29.999999999999996	111.0	59.99999999999999	566.72931	5596.98096	908.83765	1069.20947	636.21674	16.47095331857814	25.448774726032784
192	21.921567916870117	48.0	0.0	0.0	0.0	0.0	0.0	0.0	0.0	0.0	0.0	0.0	0.0	0.0	0.0	0.0	0.0	0.0	0.0	0.0	33.0	0.0	0.0	0.0	0.0	20.0	29.999999999999996	69.0	59.99999999999999	606.13348	3809.2749	199.89441	3813.59082	344.51544	8.339302649442828	84.86831410629225
